# Supplementary material for: FRET-based dual-labeled oligonucleotide probes detect target DNA by probing a minor groove environment
Source: Royal Society of Chemistry journal article supplement (doi:10.1039/d2ob00027j), 2022-01-01
Supplement: d2ob00027j1.pdf [file d2ob00027j1.pdf]

**Supplementary data for  
FRET-based dual-labeled oligonucleotide probe detects target DNA by probing a minor  
groove environment**

Shoutoku Koboku, Takumi Tsukada, Yurino Oku, Saika Kobayashi, and Yoshio Saito\*

*Department of Chemical Biology and Applied Chemistry, College of Engineering,  
Nihon University, Koriyama, Fukushima 963-8642, Japan*

*Email Address: [saitoy@chem.ce.nihon-u.ac.jp](mailto:saitoy@chem.ce.nihon-u.ac.jp)*

**Contents**

|                                                                                                                                                                    |    |
|--------------------------------------------------------------------------------------------------------------------------------------------------------------------|----|
| <b>Figure S1:</b> Excitation and UV absorption spectra of ${}^{\text{AM}37\text{z}}\mathbf{A}$ ( <b>1</b> ) in various solvents of different polarities.....       | S2 |
| <b>Figure S2:</b> HPLC analysis of the reaction mixture.....                                                                                                       | S3 |
| <b>Figure S3:</b> CD spectra of ODN( ${}^{\text{N}37\text{z}}\mathbf{A}$ ) and ODN( ${}^{\text{F}37\text{z}}\mathbf{A}$ ) hybridized with complementary ODNs ..... | S4 |
| <b>Table S1:</b> MALDI-TOF-MS spectral data for ODN( ${}^{\text{N}37\text{z}}\mathbf{A}$ ) and ODN( ${}^{\text{F}37\text{z}}\mathbf{A}$ ).....                     | S5 |
| <b>Figure S4-S14:</b> ${}^1\text{H}$ - and ${}^{13}\text{C}$ -NMR data of newly synthesized compounds.....                                                         | S6 |

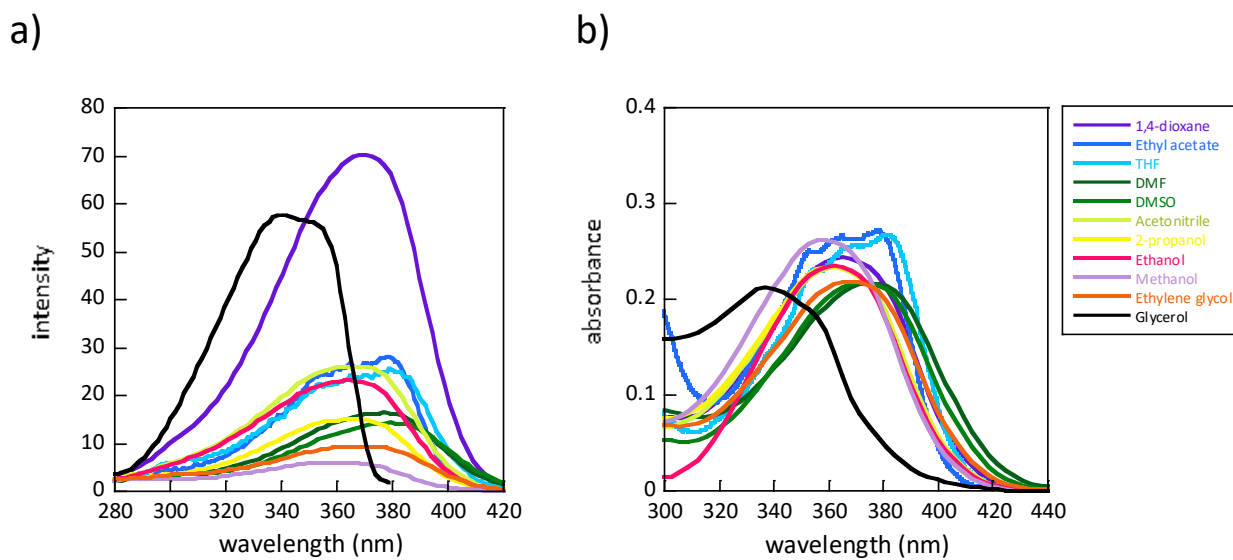

**Figure S1:** (a) Excitation and (b) UV absorption spectra of  $^{AM37zA}$  (**1**) in various solvents of different polarities. All measurements were performed at a concentration of 10  $\mu$ M.

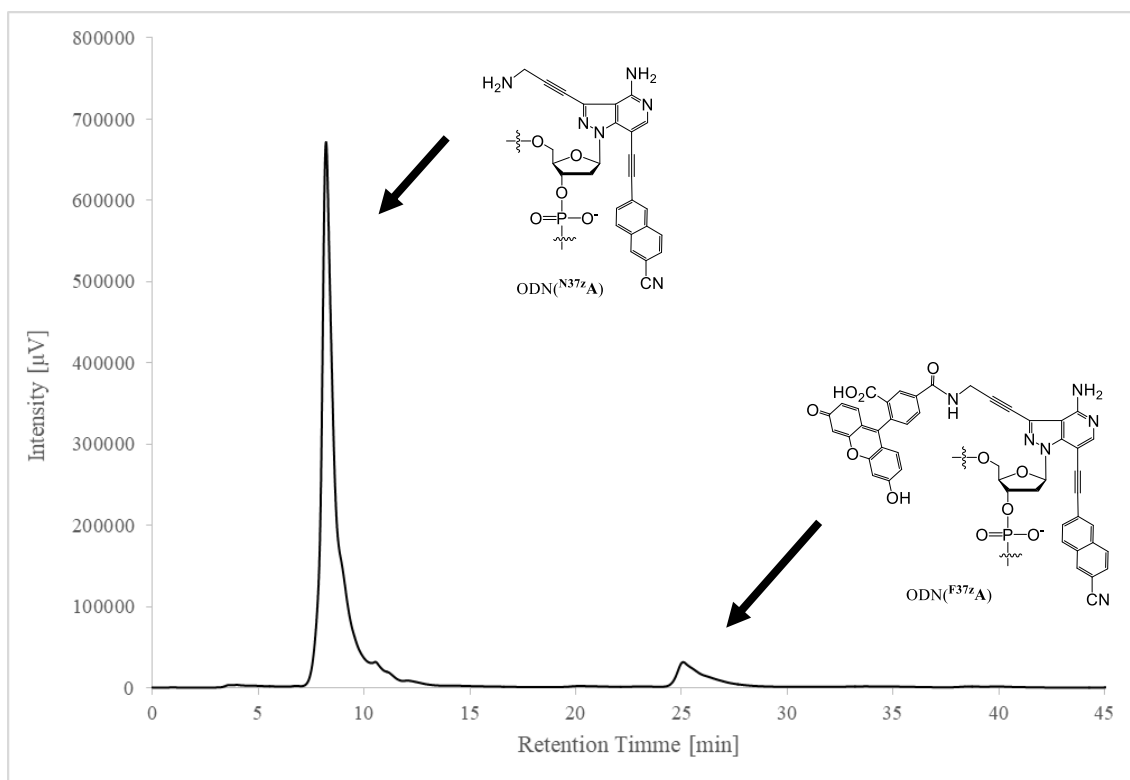

**Figure S2.** HPLC analysis of the reaction mixture (40°C, 15 h). The analysis was carried out on a CHEMCOBOND 5-ODS-H column (10×150 mm) eluted with 0.05 M ammonium formate buffer containing acetonitrile. Gradient from 3 to 30 % acetonitrile at a flow rate 2.0 ml/min over 45 min (UV detector at 260 nm).

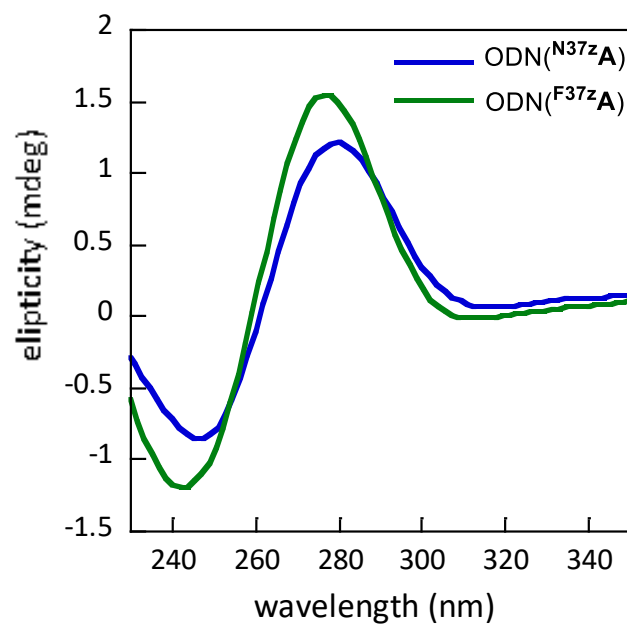

**Figure S3.** CD spectra of ODN(N<sup>37z</sup>A)/cODN(T) and ODN(F<sup>37z</sup>A)/cODN(T) (2.5  $\mu$ M duplex, 0.1 M sodium chloride, 50 mM sodium phosphate buffer, pH 7.0, rt).

**Table S1.** MALDI-TOF-MS spectral data for ODNs

| ODNs                    | Sequences                                | MALDI-TOF-MS                |                            |
|-------------------------|------------------------------------------|-----------------------------|----------------------------|
|                         |                                          | calcd. [M + H] <sup>+</sup> | found [M + H] <sup>+</sup> |
| ODN( <sup>N37z</sup> A) | 5'-d(CGCAAC <sup>N37z</sup> A CAACGC)-3' | 4127.7                      | 4127.5                     |
| ODN( <sup>F37z</sup> A) | 5'-d(CGCAAC <sup>F37z</sup> A CAACGC)-3' | 4485.8                      | 4485.1                     |

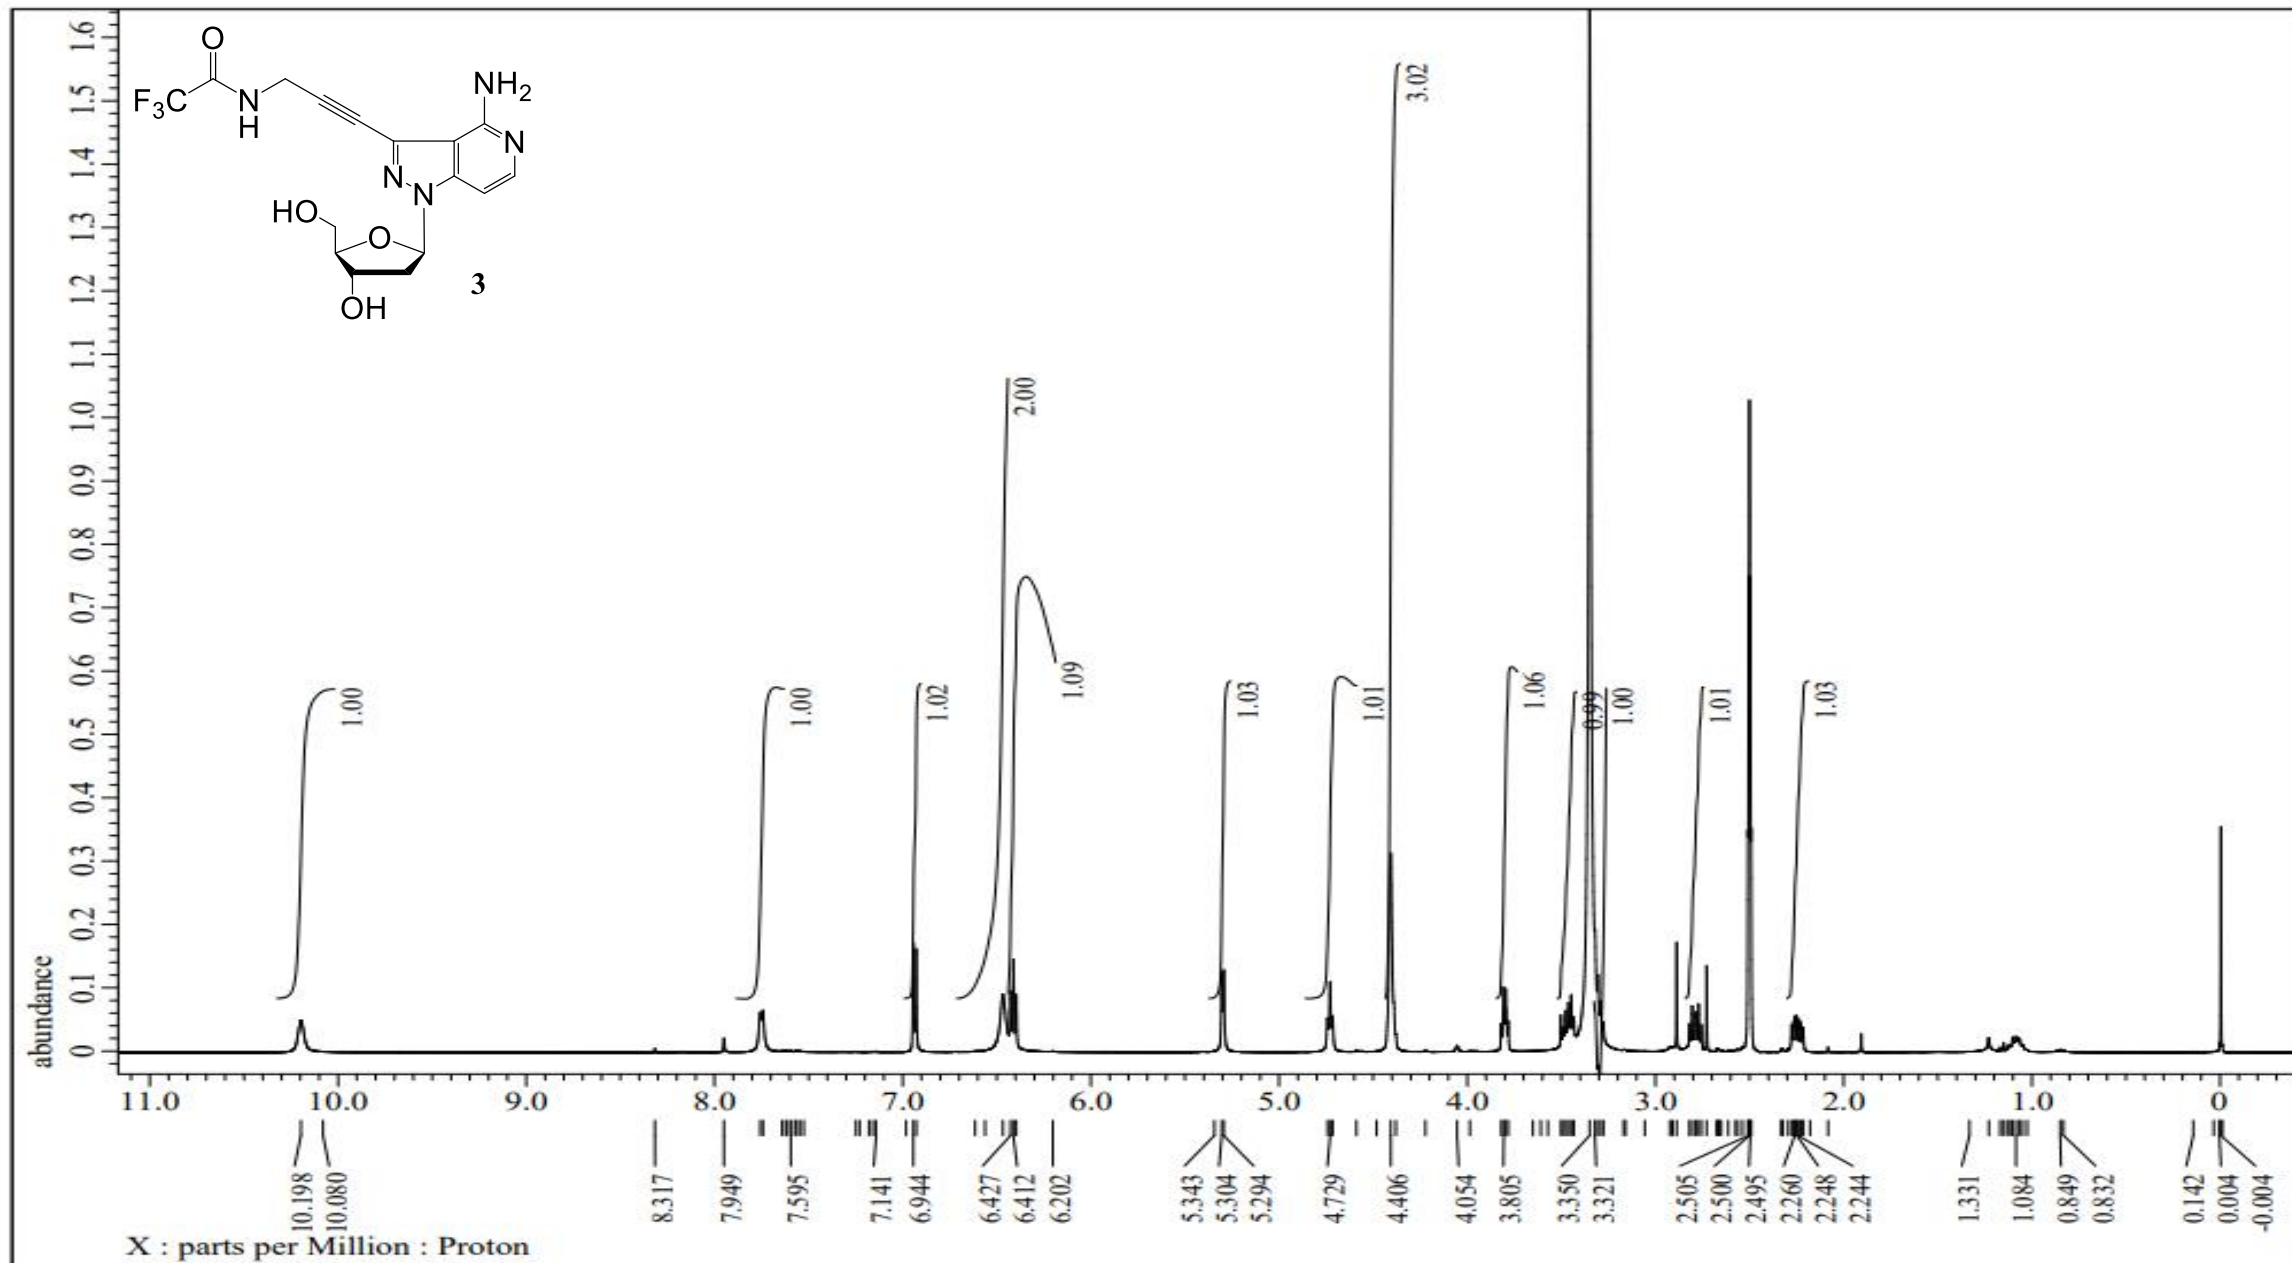

Figure S4. <sup>1</sup>H-NMR spectrum of compound 3 (DMSO-*d*<sub>6</sub>)

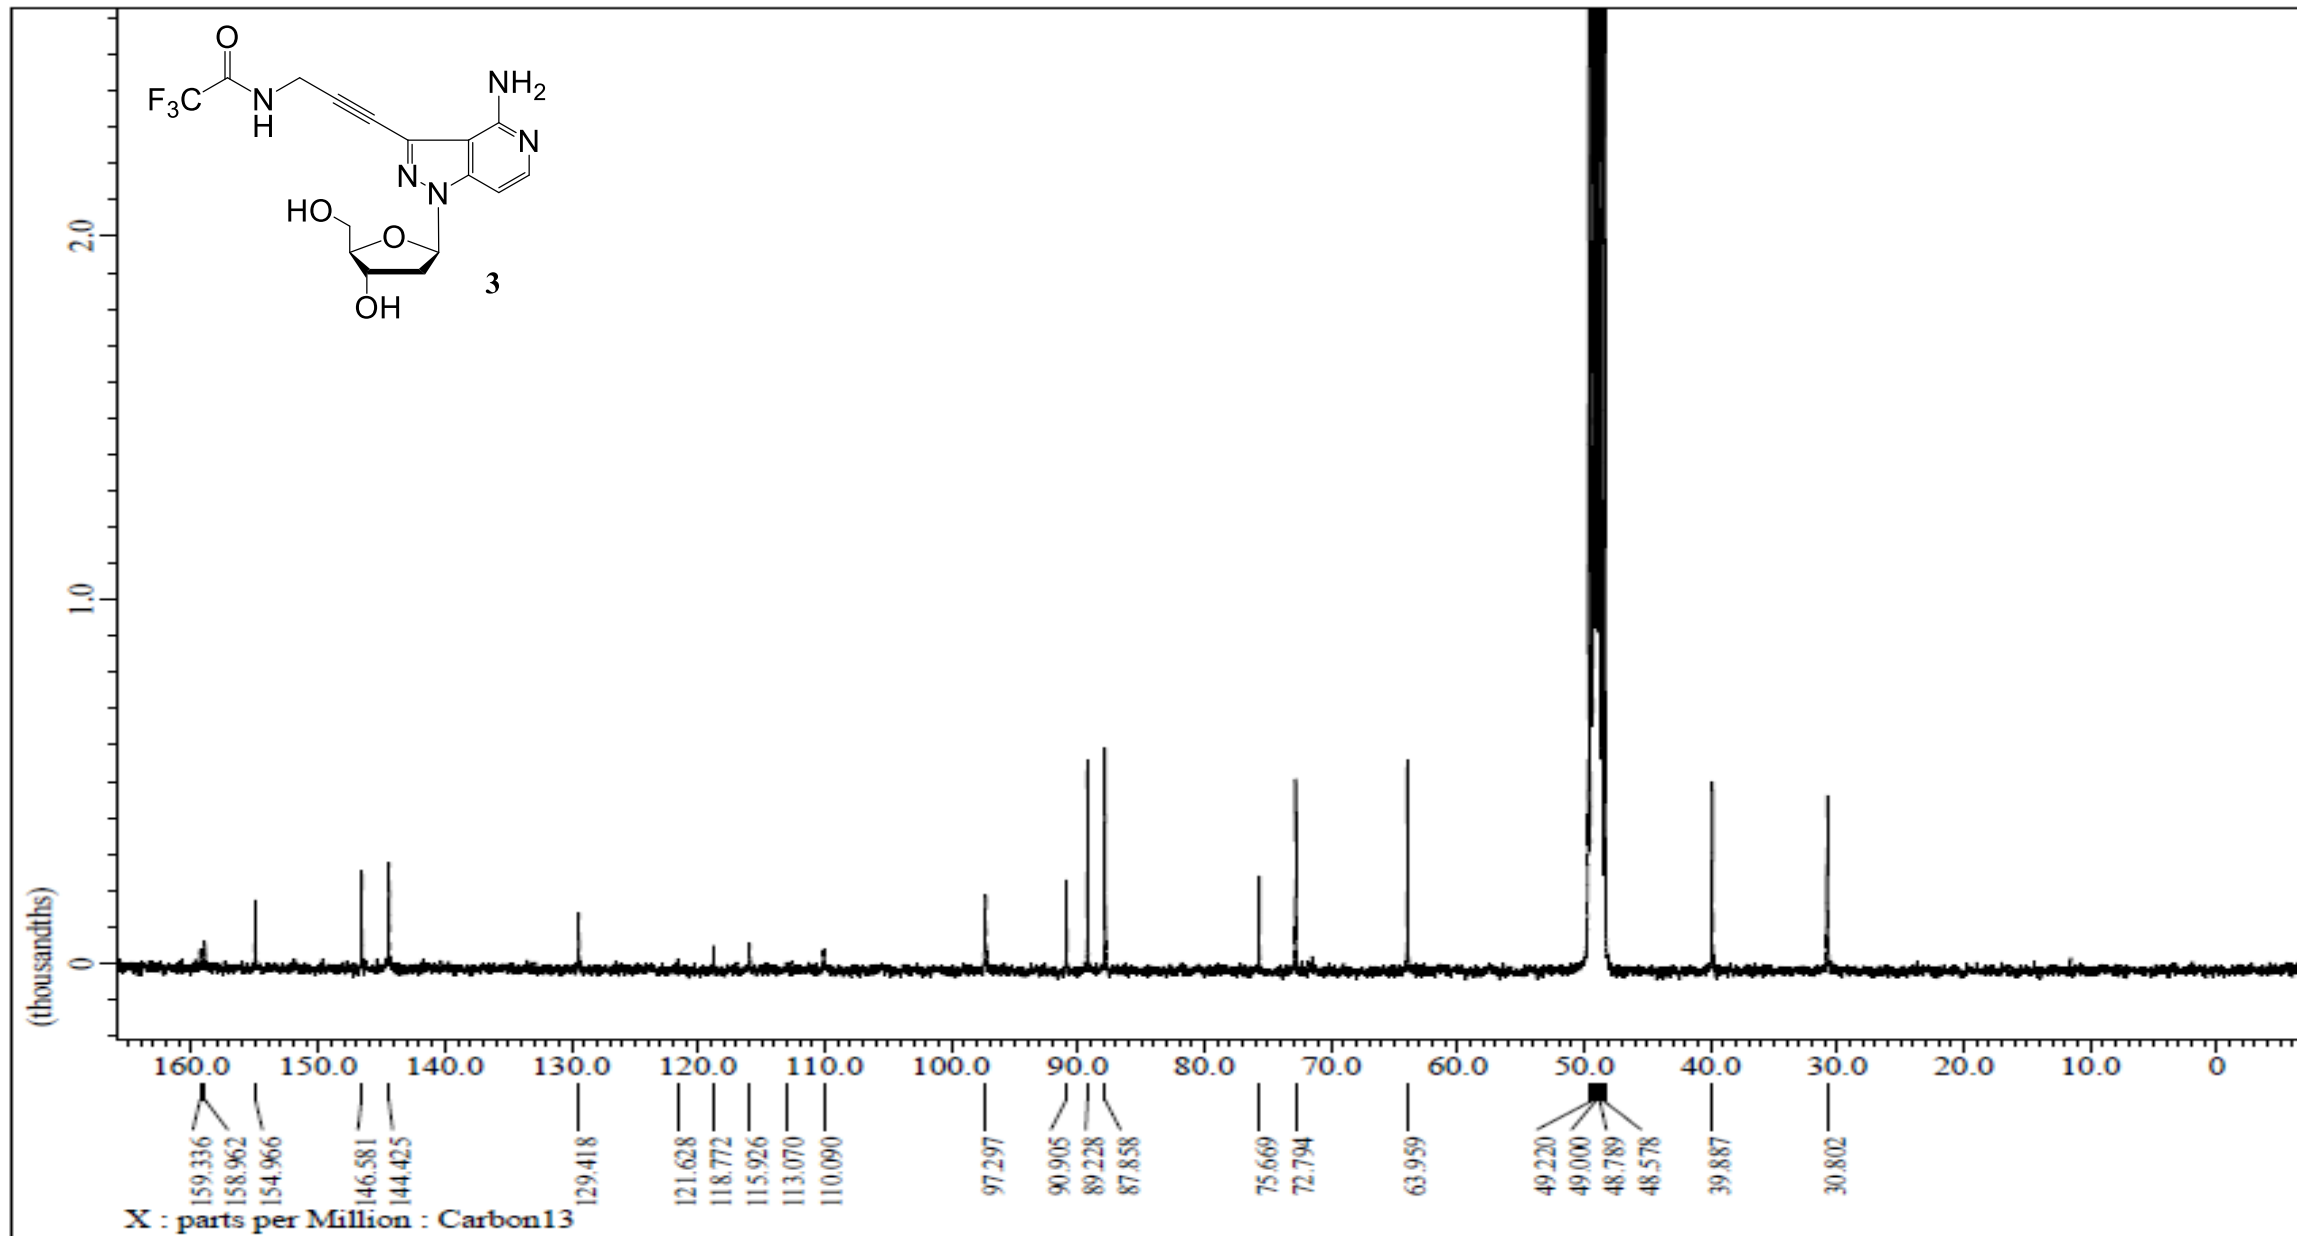

Figure S5.  $^{13}\text{C}$ -NMR spectrum of compound 3 (CD $_3$ OD)

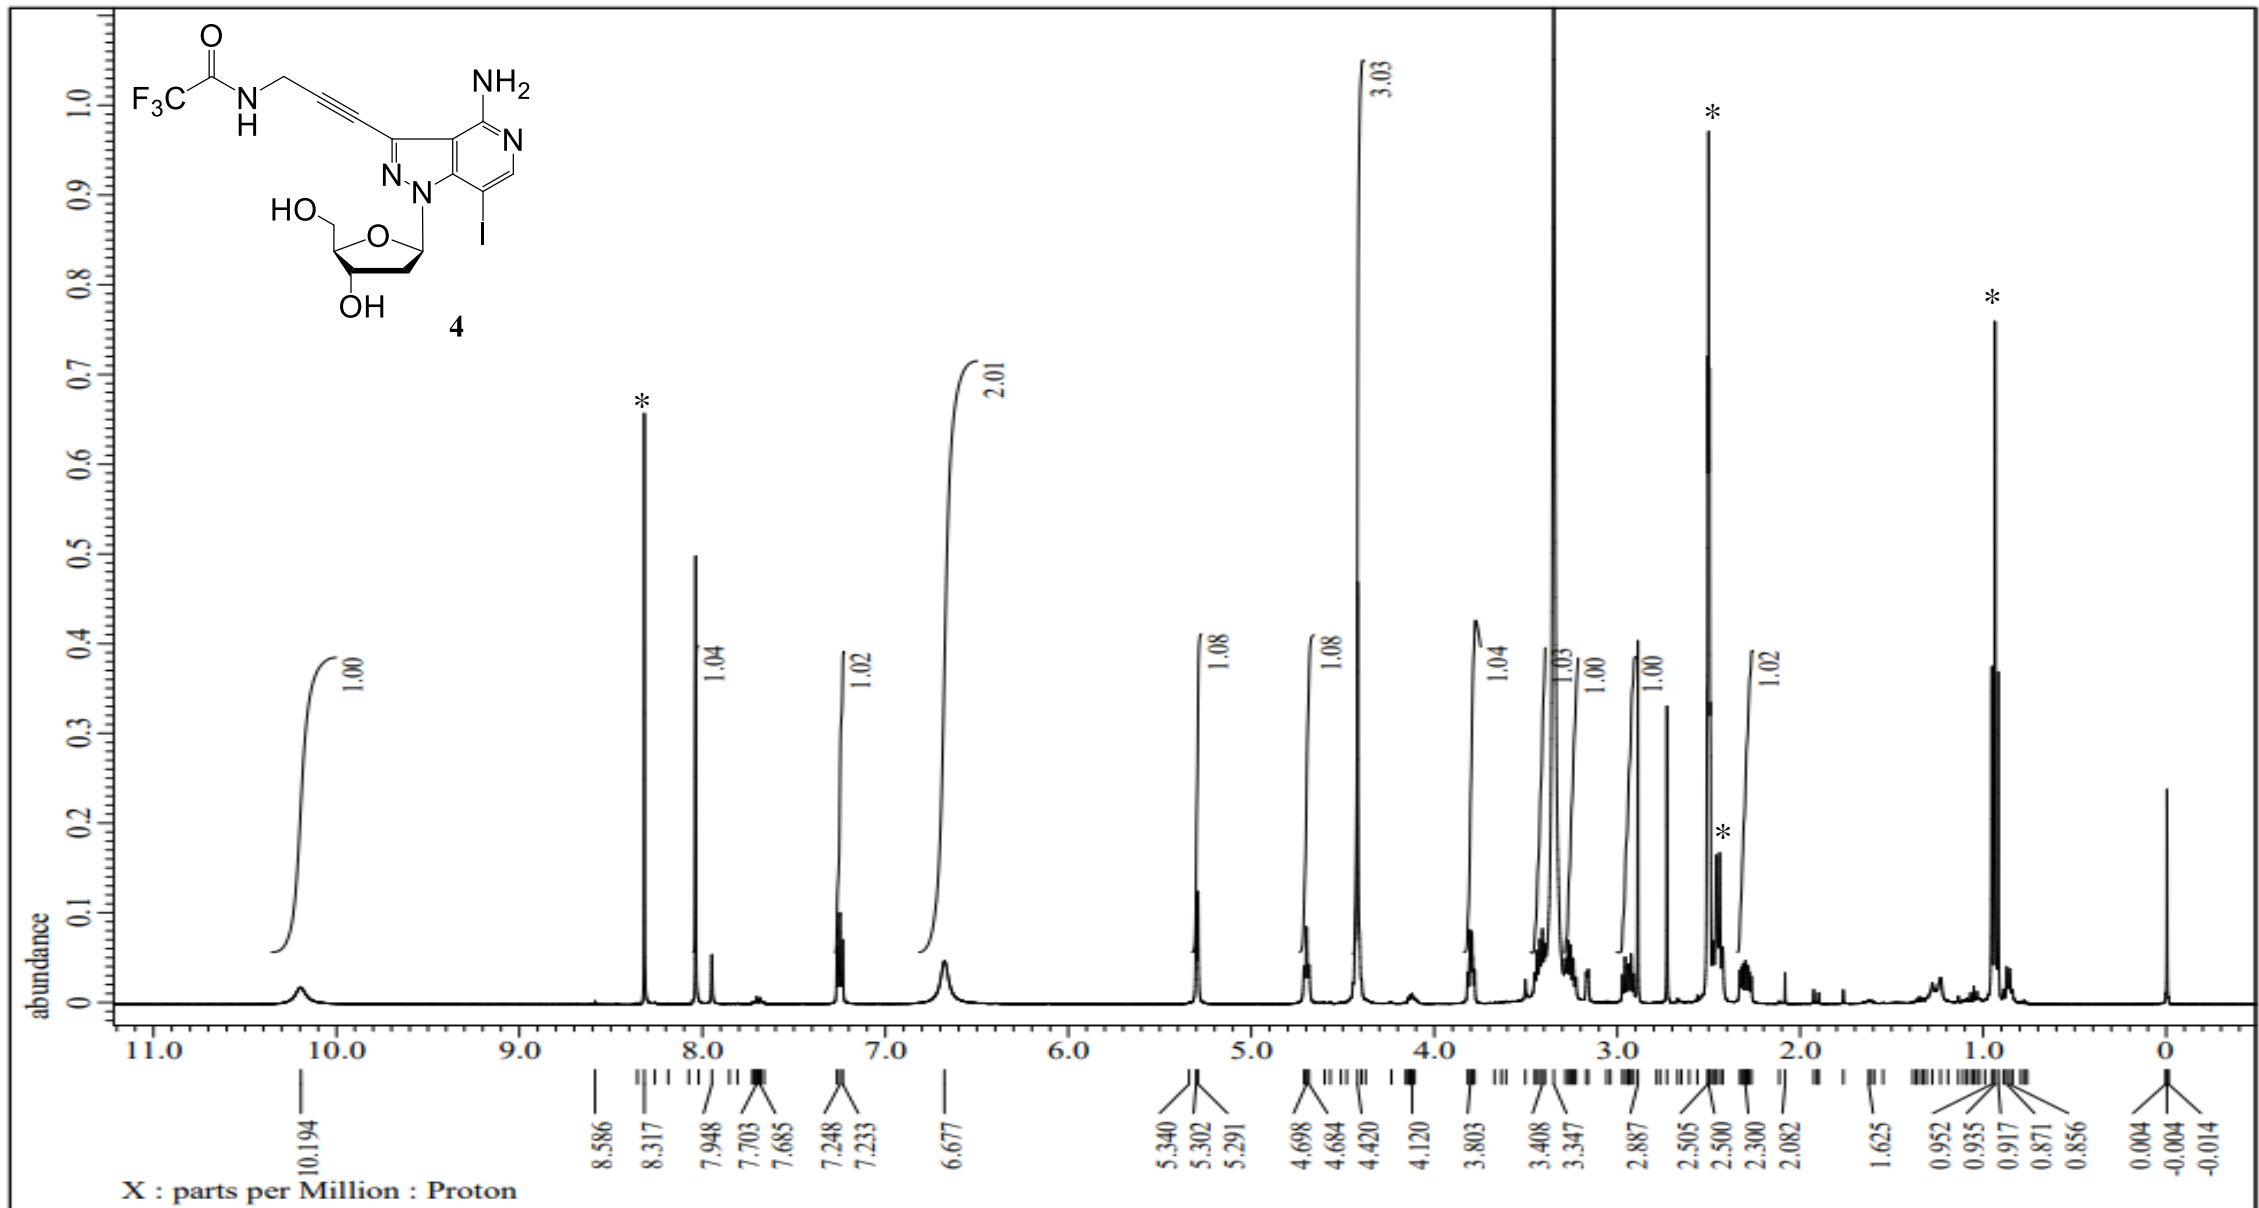

\*:solvent impurities

Figure S6.  $^1\text{H-NMR}$  spectrum of compound **4** ( $\text{DMSO-}d_6$ )



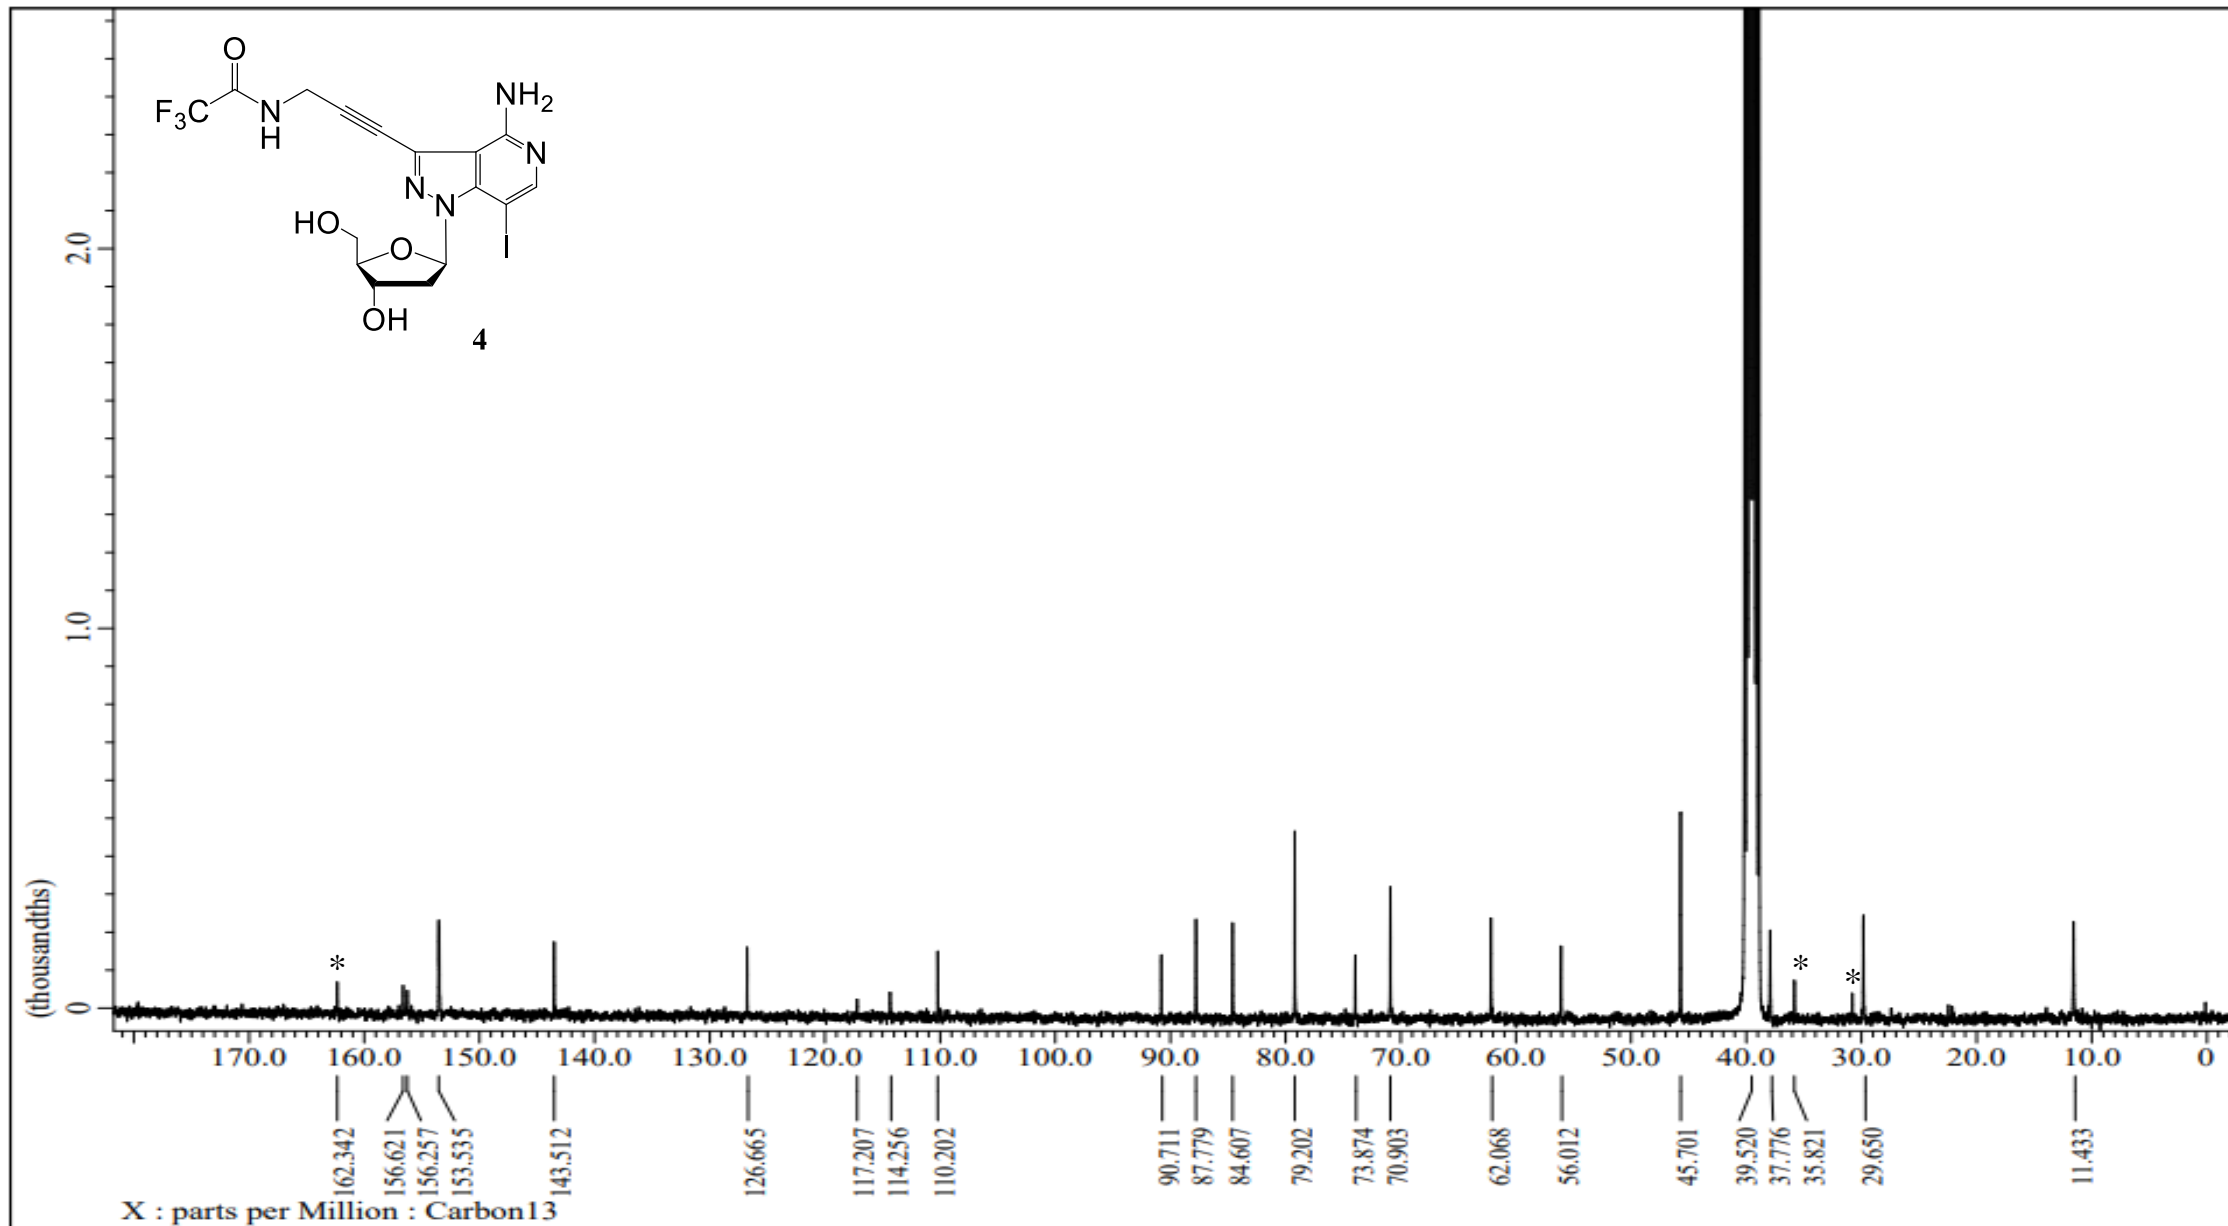

\*:solvent impurities

Figure S7. <sup>13</sup>C-NMR spectrum of compound 4 (DMSO-*d*<sub>6</sub>)

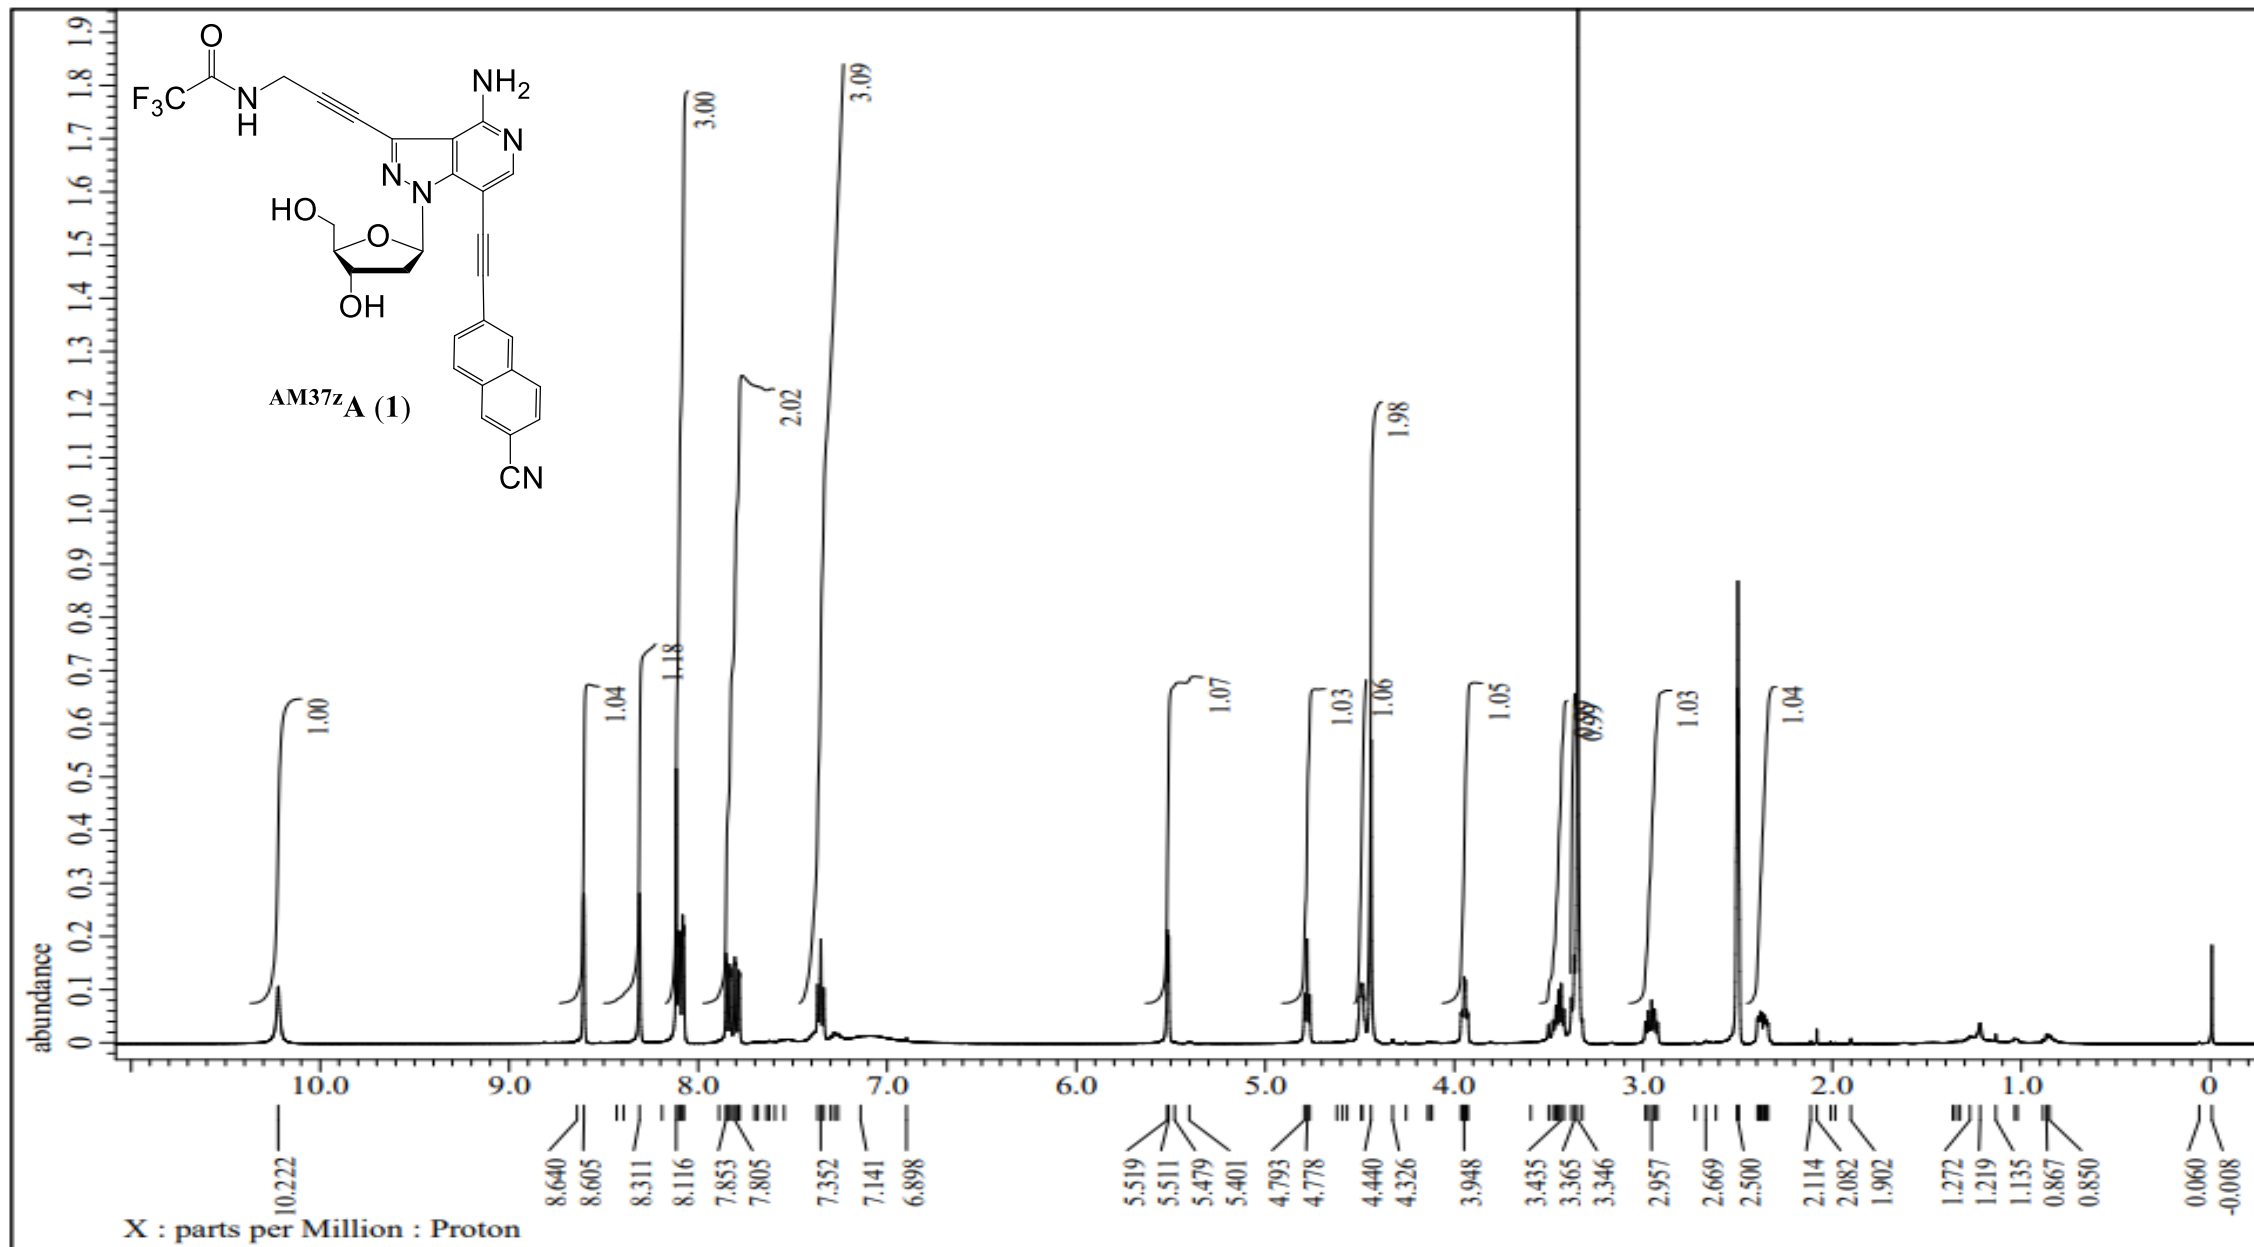

Figure S8.  $^1\text{H-NMR}$  spectrum of  $\text{AM}^{37z}\text{A}$  (1) ( $\text{DMSO-}d_6$ )

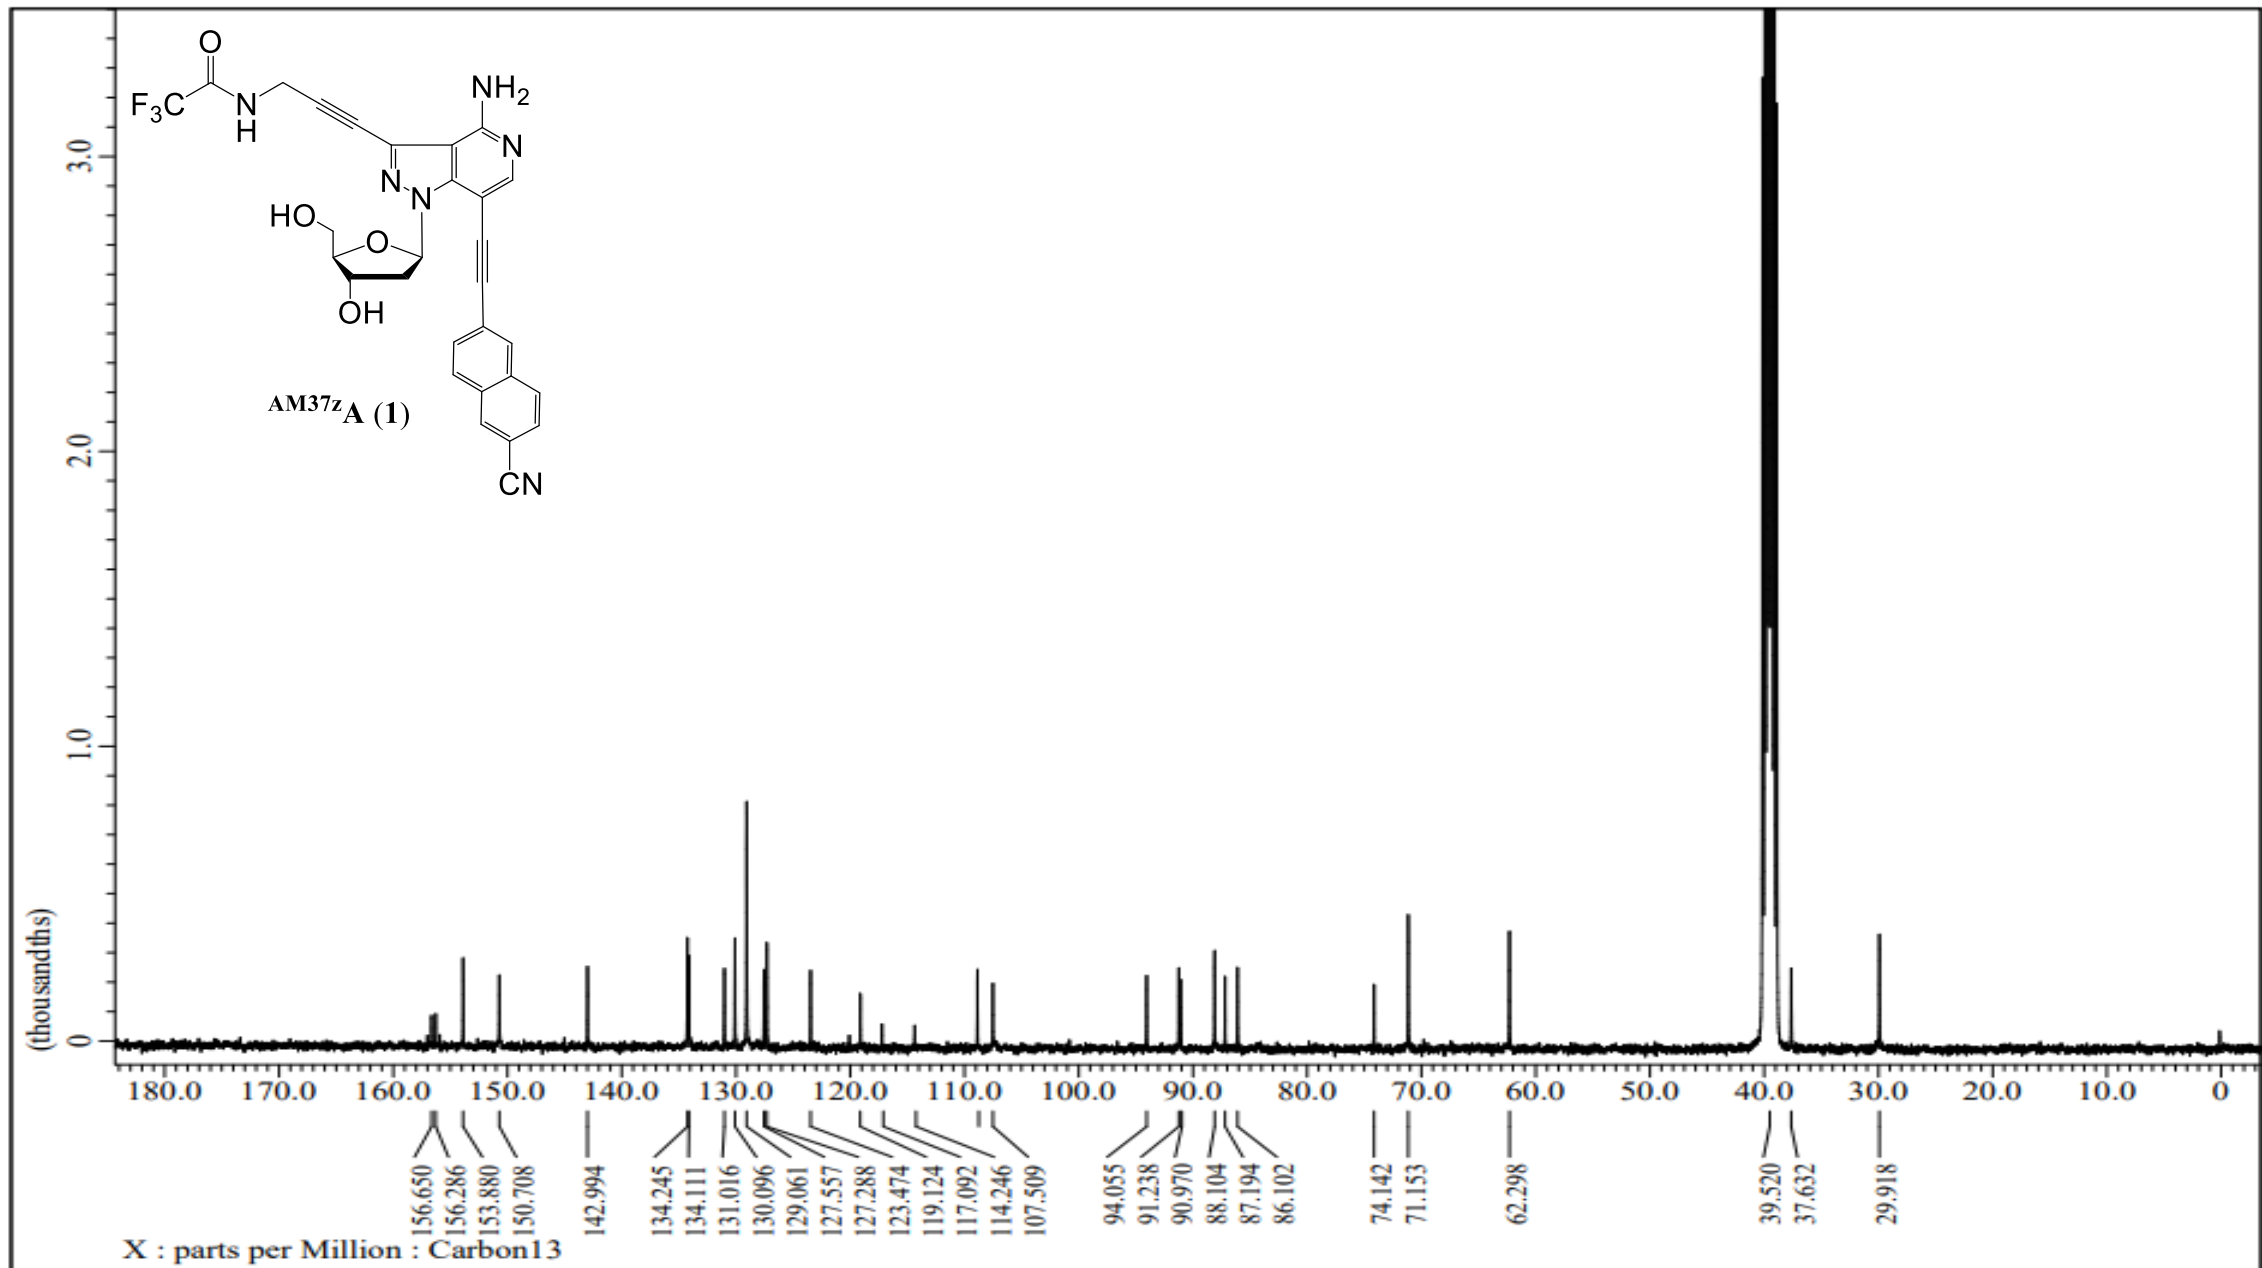

Figure S9. <sup>13</sup>C-NMR spectrum of AM37zA (1) (DMSO-*d*<sub>6</sub>)

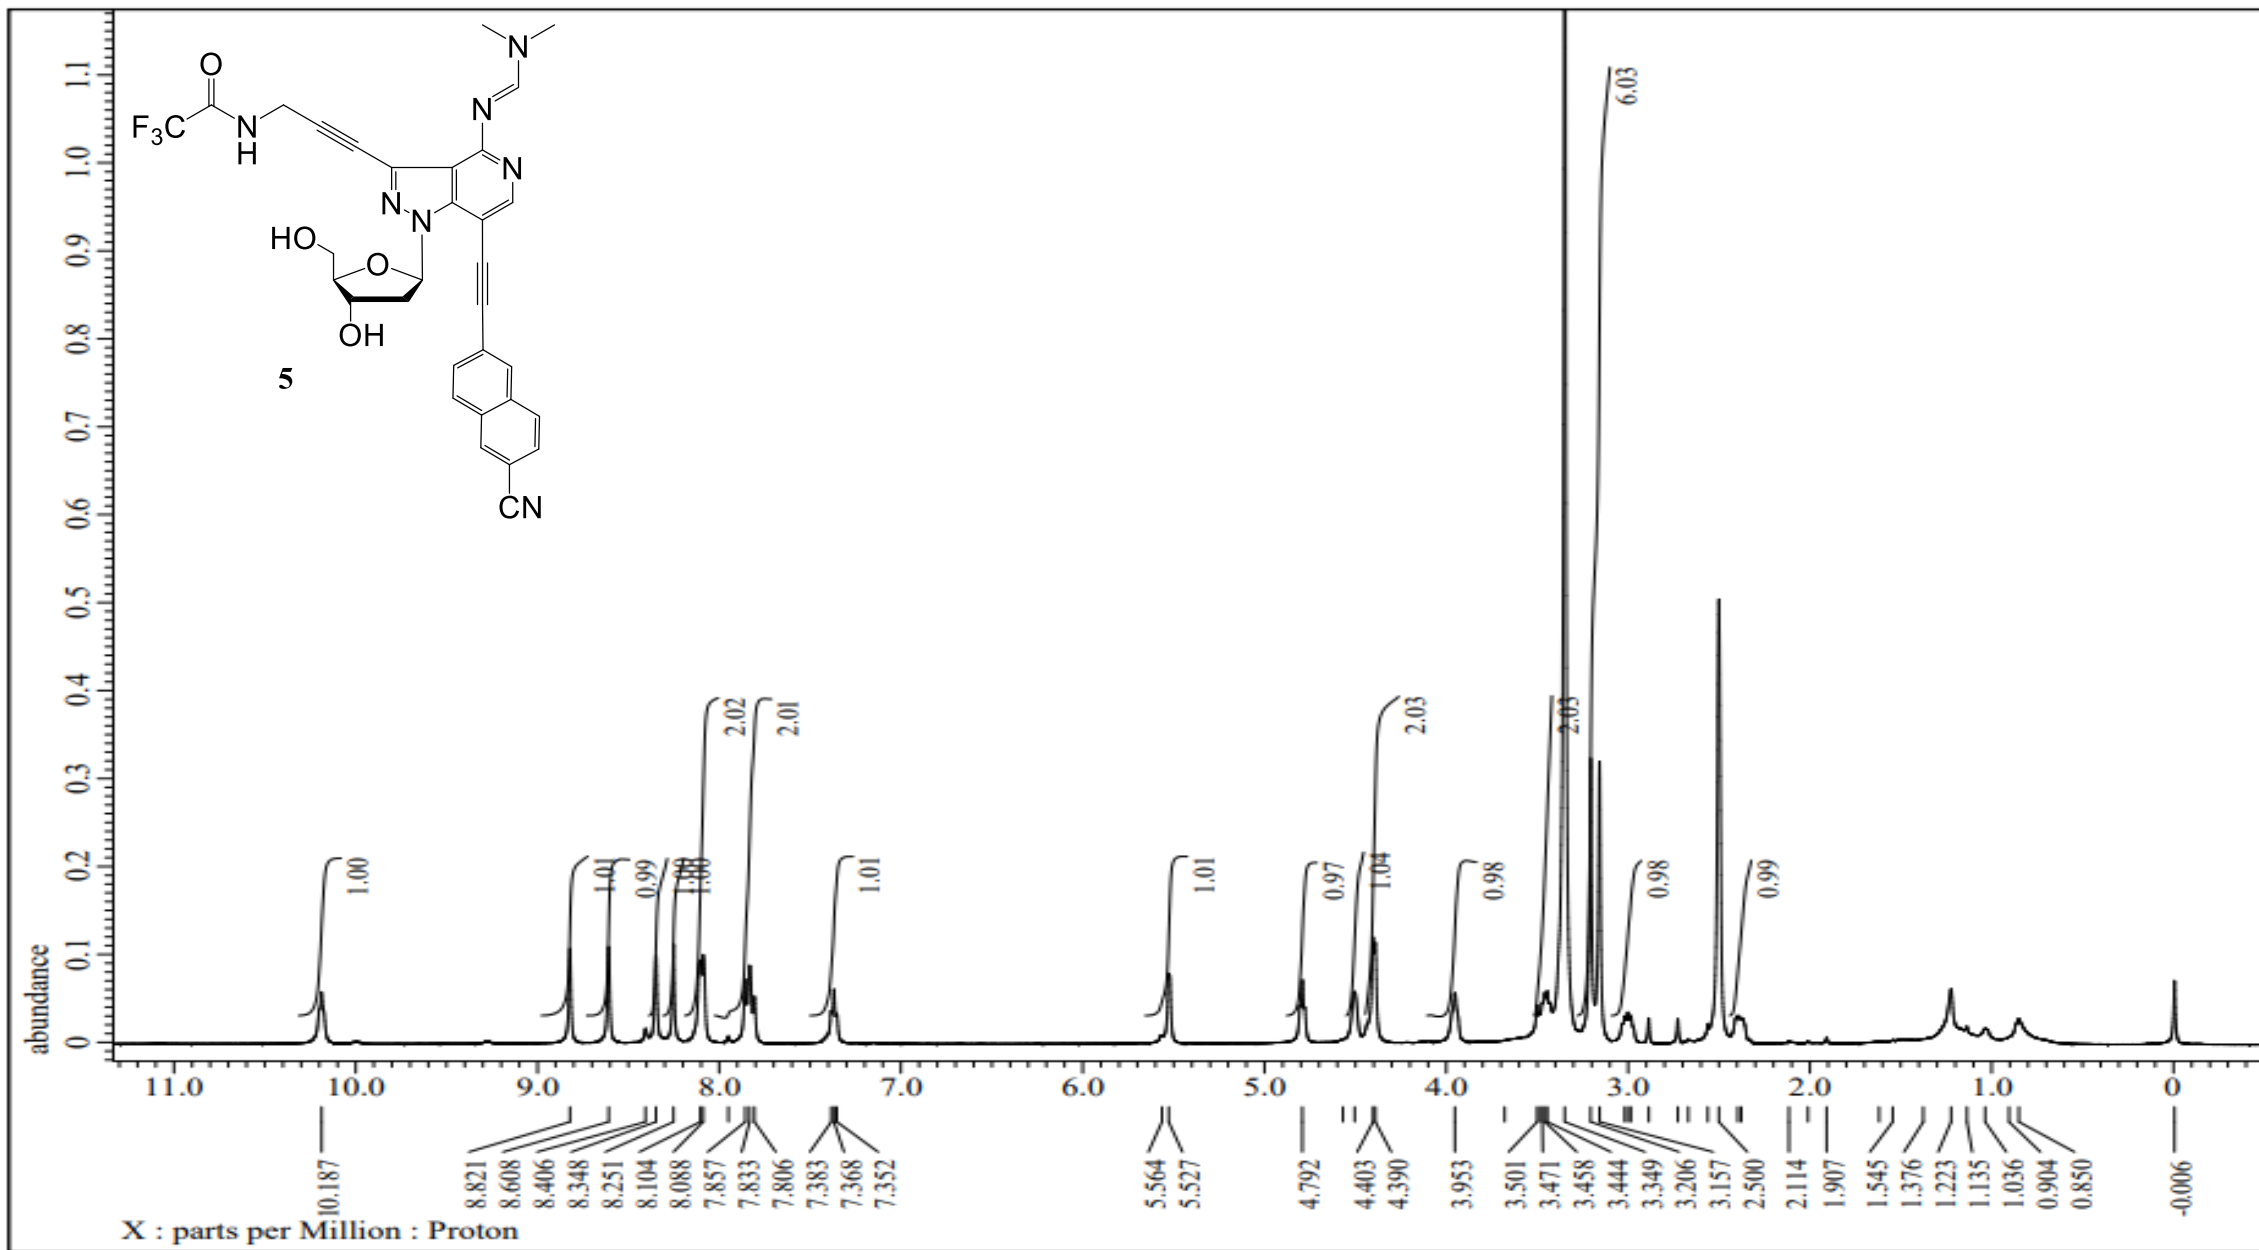

Figure S10. <sup>1</sup>H-NMR spectrum of compound **5** (DMSO-*d*<sub>6</sub>)

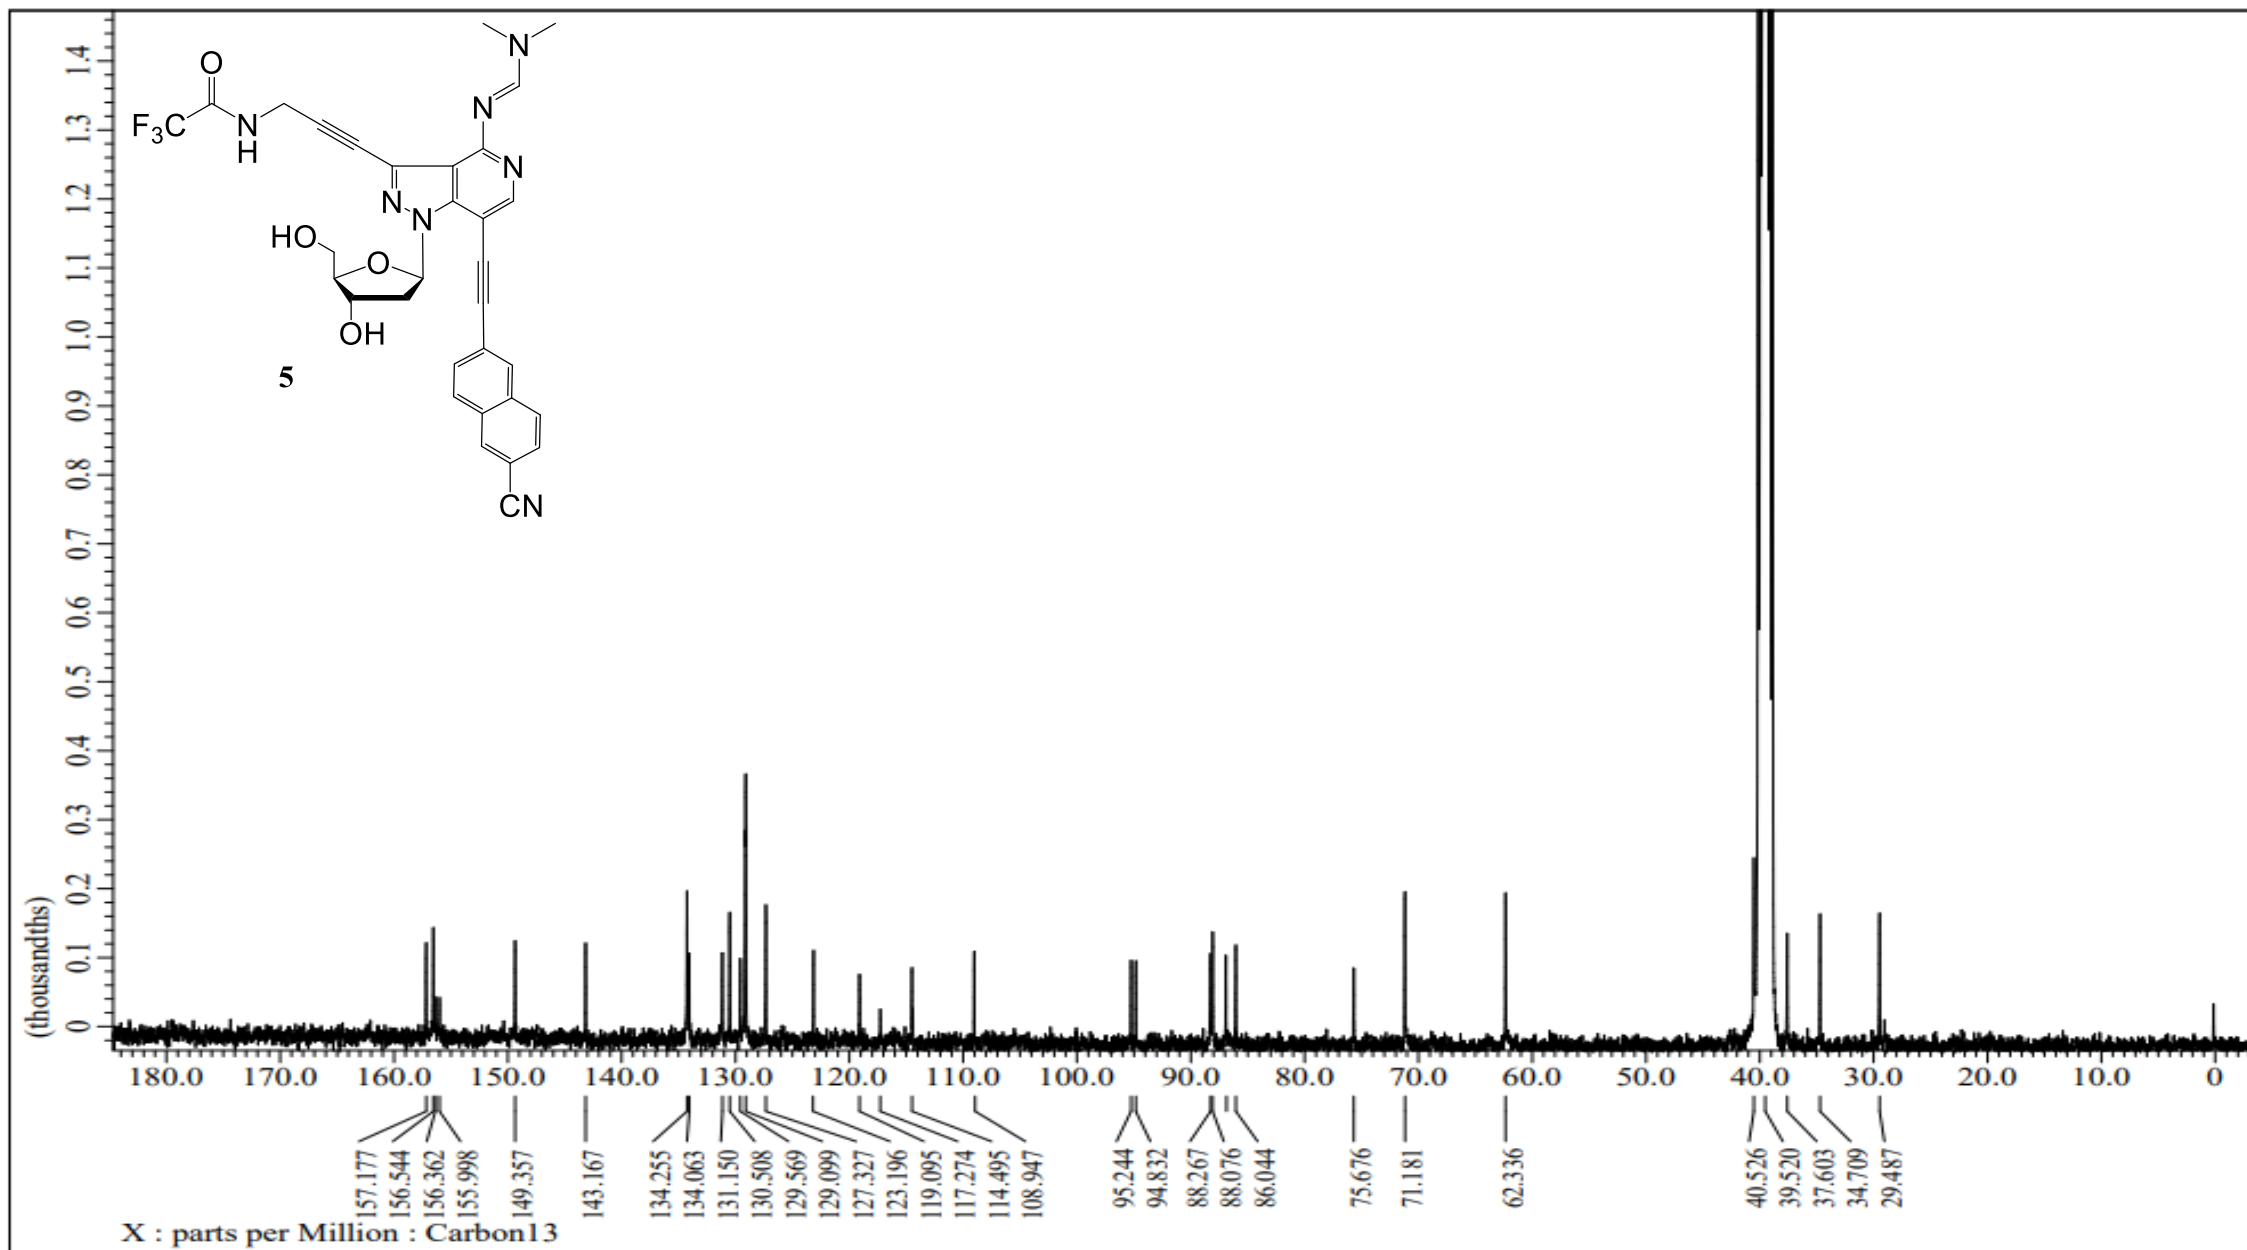

Figure S11.  $^{13}\text{C}$ -NMR spectrum of compound **5** (DMSO- $d_6$ )

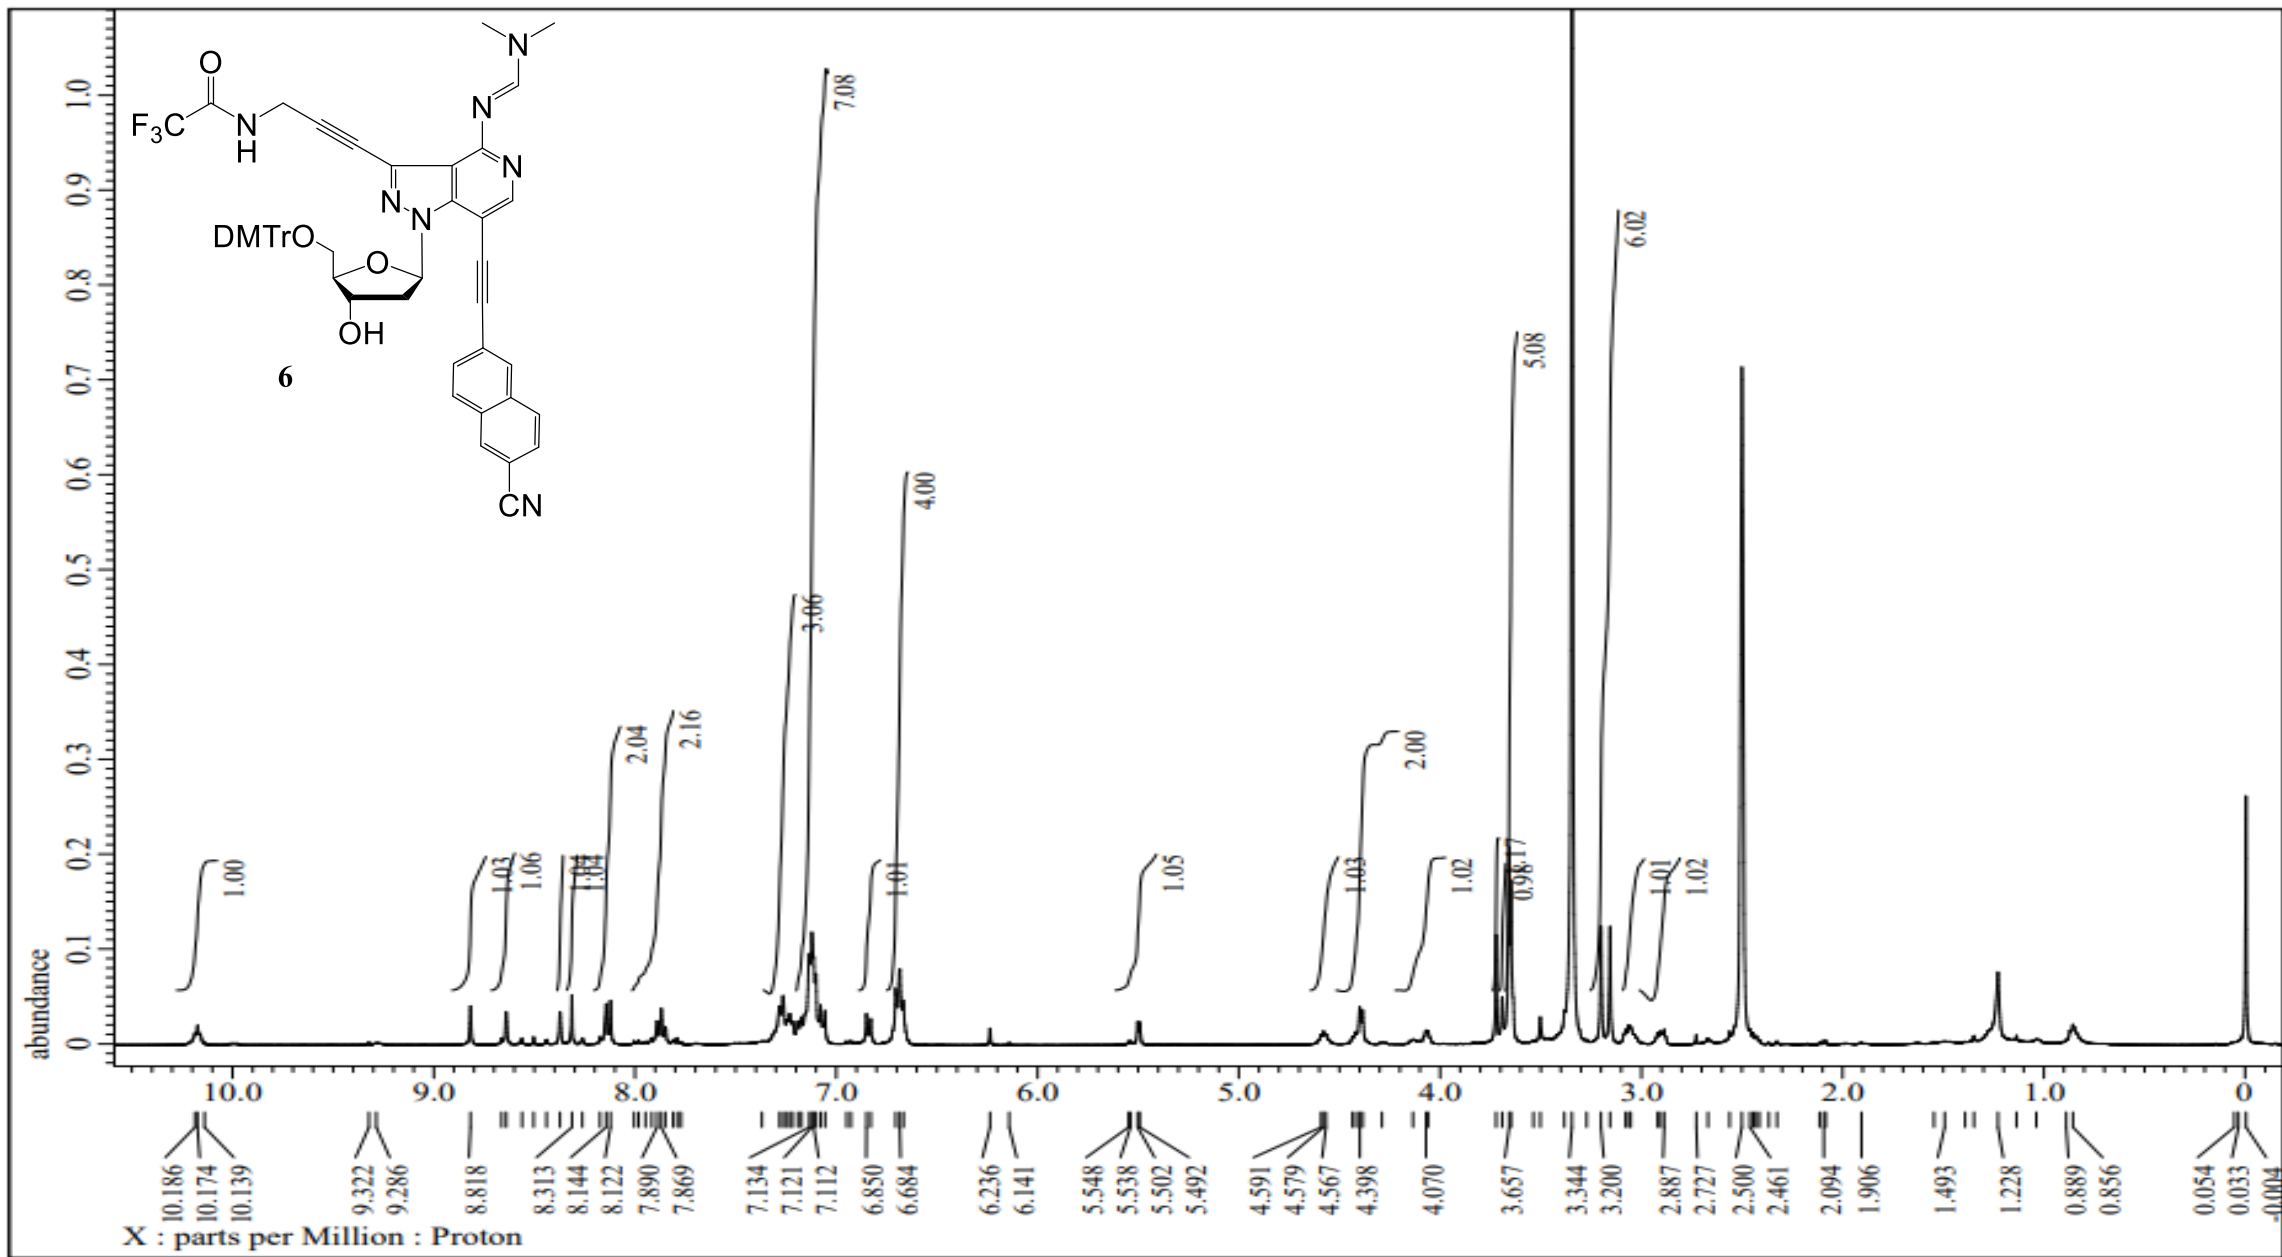

Figure S12.  $^1\text{H-NMR}$  spectrum of compound **6** ( $\text{DMSO-}d_6$ )

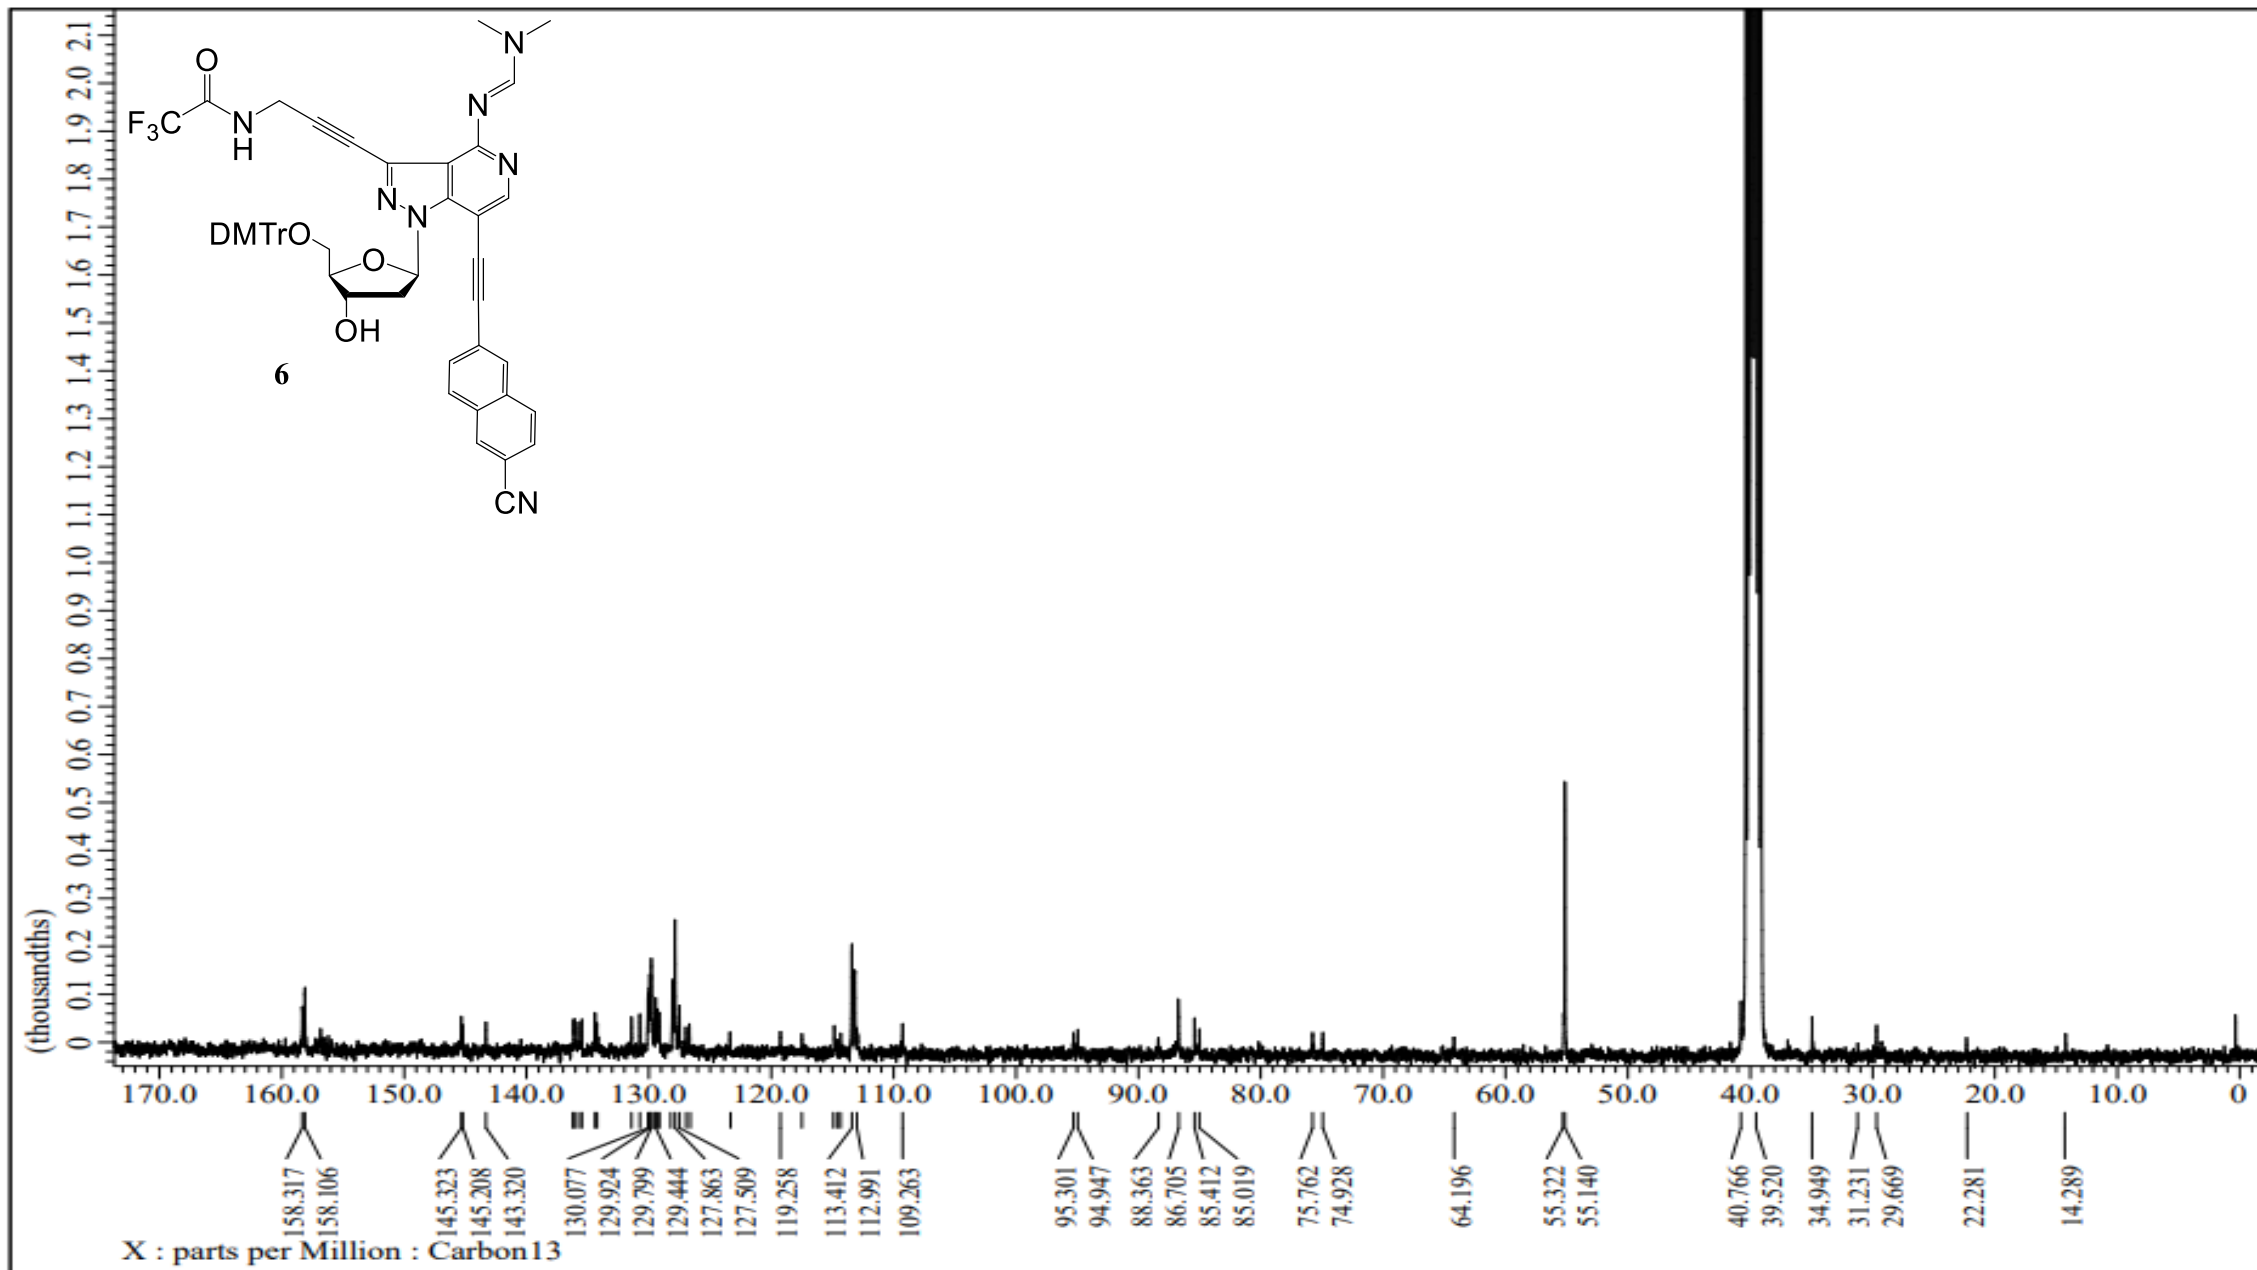

Figure S13.  $^{13}\text{C}$ -NMR spectrum of compound **6** ( $\text{DMSO-}d_6$ )

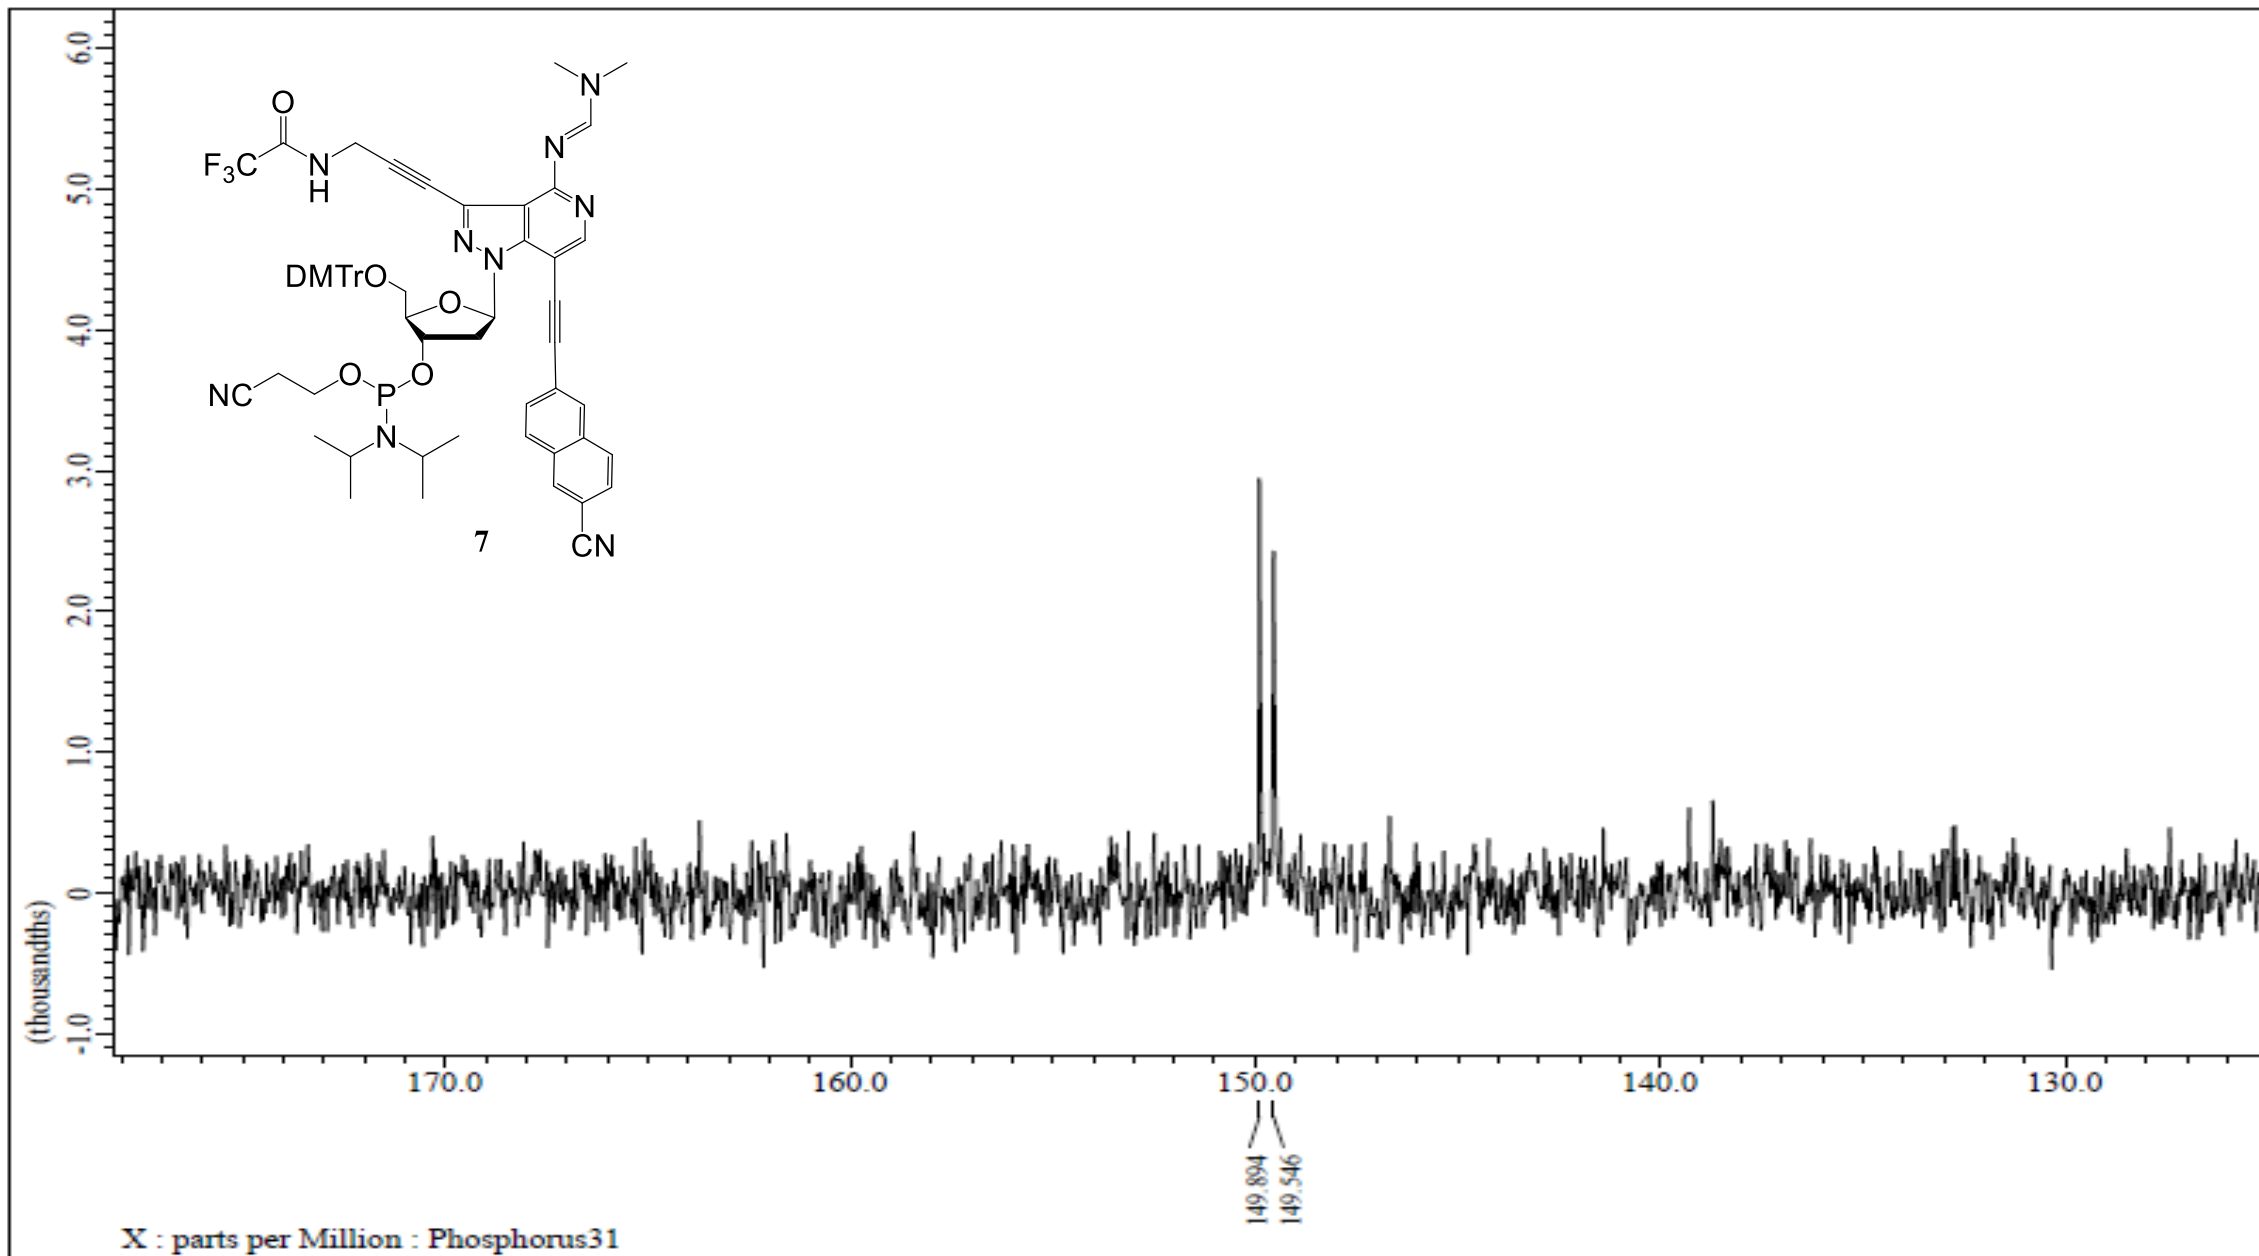

Figure S14.  $^{31}\text{P}$ -NMR spectrum of compound **7** ( $\text{CDCl}_3$ )
